# Supplementary material for: An economical in-class sticker microfluidic activity develops student expertise in microscale physics and device manufacturing
Source: Royal Society of Chemistry journal article supplement (doi:10.1039/d3lc00912b), 2024-01-01
Supplement: d3lc00912b2.pdf [file d3lc00912b2.pdf]

Instructions: Please answer the questions to the best of your knowledge without using notes/aids, Once you are finished, please rate in the right margin your confidence in your answer with 1 being least confident and 5 being most confident

| Questions                                                                                                                                                                     | Confidence in Answer (1, least to 5, most) |
|-------------------------------------------------------------------------------------------------------------------------------------------------------------------------------|--------------------------------------------|
| 1. How does fluid move and mix at the microscale in comparison to the macroscale?                                                                                             |                                            |
| 2. Here is an image of a 3d microfluidic mixer. How does it increase mixing efficiency?<br>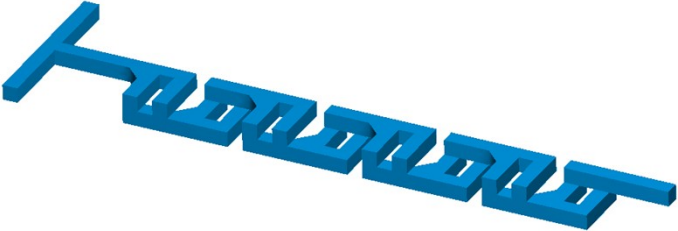 |                                            |
| 3. Using the 3d image of the microfluidic mixer, please draw the individual layers needed to create this device.                                                              |                                            |
| 4. How are liquid droplets created in microfluidics?                                                                                                                          |                                            |

Instructions: Please answer the questions to the best of your knowledge without using notes/aids, Once you are finished, please rate in the right margin your confidence in your answer with 1 being least confident and 5 being most confident

| Questions                                                                                                                  | Confidence in Answer (1, least to 5, most) |
|----------------------------------------------------------------------------------------------------------------------------|--------------------------------------------|
| 5. Can you draw a top view and cross section of a structure likely to create droplets?                                     |                                            |
| 6. What is a microfluidic valve and how is it controlled?                                                                  |                                            |
| 7. Can you draw a top view and cross section of a microfluidic valve using 2 fluidic channels?<br>(Multiple layers are ok) |                                            |
| 8. How do air bubbles affect the operation of a microfluidic?                                                              |                                            |

Instructions: Please answer the questions to the best of your knowledge without using notes/aids, Once you are finished, please rate in the right margin your confidence in your answer with 1 being least confident and 5 being most confident

| <b>Questions</b>                                                                  | <b>Confidence in Answer (1, least to 5, most)</b> |
|-----------------------------------------------------------------------------------|---------------------------------------------------|
| 9. What are tolerances and why are they important in manufacturing microfluidics? |                                                   |
