# Supplementary material for: An economical in-class sticker microfluidic activity develops student expertise in microscale physics and device manufacturing
Source: Royal Society of Chemistry journal article supplement (doi:10.1039/d3lc00912b), 2024-01-01
Supplement: d3lc00912b5.xlsx [file d3lc00912b5.xlsx]

## Sheet: Sheet1
	Paper	Using inexpensive Jell-o chips for hands-on microfluidics education	Shrink-film microfluidic education modules: Complete devices within minutes	A student-made microfluidic device for electrophoretic separation of food dyes	Chemistry in microfluidic chnanels	Teaching single-cell digital analytis using droplet-based microfluidics	Microfluidics for high school chemistry students	A comprehensive microfluidics device construction and characterization module for the advanced analytical chemistry laboratory	Microfluidic assembly kit based on laser-cut building blocks for education and fast prototyping	Student-fabricated microfluidic devices as flow reactors for organic and inorganic synthesis	Lab-on-a-chip workshop activities for secondary school students	Student-led microfluidics lab practicals: Improving engagement and learning outcomes	Design of problem-based learning activities in the field of microfluidics for 12 to 13 year old participants - small plumbing!: empowering the next generation of microfluidic engineers	Lab-on-a-Chip: Frontier Science in the Classroom	An interdisciplinary and application-oriented approach to teach microfluidics
	Year	2010	2011	2011	2011	2012	2014	2014	2015	2015	2016	2016	2016	2018	2021
Greet section	Intervention	Introduce concepts: molding, flow, diffusion, chemical reactions	3 hands-on modules: 1. Separation and diffusion (Middle School) 2. Gradient Generation (High School) 3. Immunoassay (College Undergrad)	Students build single layer microfluidic with photolithography methods then use device to electrophoretically separate food dyes	Students built and used microfluidics to visualize chemical reactions.	Experiment introducing students to digital droplet microfluidic assays.	Design challenge for high school students in groups of 3-4 to design microfluidic mixer that can generate 5 different regions of pH levels	4 week long lab module	Kit for children to assemble multilayer devices from plexiglass	Lab activity for students to design and fabricate microfluidics to organic and inorganic synthesis	Workshop with five stations: milling, moulding, gradients, tissue, and paper	Problem based lab activity including three lectures, COMSOL modeling, and lab practical with written report due at the end	Introduce students to microfluidic principles and engineering process through design of a mixer	Lesson series for high schoolers to learn about laminar flow, mixing, and droplet generatoin.	Students assigned problems: 1. Find an application in which microfluidics enable a difficult to reaclize experiment 2: Instructor assigned project in which students design and perform a microfluidic experiment
	Theory	No mention	Provide modules to facilitate learning in middle school, high school, and college undergrad	Introduce microfluidics and capillary electorphoresis to undergraduates	Explore intersection of chemistry, biology, and materials science principles.	Practical experiment session supplementing theoretical education	Collective problem solving	Experiential learning	No mention	Inquiry-Based/Discovery Learning	No mention	Problem Based Learning	Problem Based Learning	Provide introduction to microfluidic concepts to high school students	Application-oriented approach with theoretical and practical teaching
	Learning Objectives	No mention	Yes, Fabrication & Operation of: 1: H-filter, 2. Gradient generator 3. Immunoassay on a chip	Students test device, should see red dye move afead of blue dye towards postive electrode. Students asked to order of elution. Dyes have same charge but different frictional resistance	Students used microfluidics to compare and contrast chemical reactions under laminar flow vs bulk reactions.	Microfluidic fabrication, laminar flow, reynold's number, peclet number, advantages of droplet microfluidics	Introduce high scool students to mixing in laminar flow.	Understanding of microfluidic principles and applications of analytical chemistry concepts in lab on chip	Microscale mixing of liquids, understand device operation, 3d thinking, layer-by-layer construction, droplet formation, phototaxis	Demonstrating versatility of microfluidics through applications in flow synthesis	Kept short/simple and focused on core concepts related to each workstation	Introduce students to microfluidic design, manufacturing, and performance characterization. Can choose to design H-filter, pinch flow fractionation, mixer	Develop understanding of microfluidic design and fabrication	Lab on chip schematic interpretation, ideation of new lab-on-chip design, mixing, logical layout and design issues, and detection methods	Not explicit, but topics include how to formulate an appropriate microfluidics question, how to design a microfluidic based experiment, an introduction to microfluidic simulation
	EBP Content	SKIP THIS - SEE TABLE NOTE
	Materials	Coffee stirrers, Jell-o, aluminum plates	see below	see below	see below	see below	see below	see below	see below	see below	see below	see below	see below	see below	Lecture materials, and 5 pre-made microfluidic kits: glucose detection, viscometer, flow characterization in porous medium, droplet-based microfluidics, and droplet based microfluidics
	Educational Strategies	No mention	1. Hands-on activities 2. Theory and background on underlying physics	Lab activity where students construct microfluidic	Lab activity that allows students to directly compare reactoins in the microfluidic channels vs bulk behavior	Theoretical exercises on calculations for digital analyses then ImageJ analysis of experimental results from activity	Lab activity where students design predictable mixer	Students worked in pairs to design and fabricate devies then build lab on chip devices for microchannel electrophoretic separation of DNA ladder	Hands on activity to build and test various microfluidics	Students designed/manufactured flow reactors and observed diffusion in laminar flow, creation of magnetite particles, nanoparticles, and mixing of azo dyes.	At each workstation: poster, instructor engagement, and hands on related activity	Critical thinking to solve each of the three microfluidic design challenges	Wanted students to understand basic microfluidic principles and laminar flow, understand integration of different components, and be able to design and operate their own microfluidics	Hands on lab practicals, and a test on the key takeaways	Open ended questions with student discussion, self-guided hands on activities with instructor support; student design project presentation with instructor feedback
	Incentives	No mention	No mention	No mention	No mention	no mention	No mention	No mention	No mention	No mention	No mention	No mention	No mention	No mention	Offered to MS/PhD students to complement research
	Instructors	No mention	No mention	At least 1 instructor, but details are limited	Standard lab instructor/TA	Standard lab instructor/TA	1 instructor	Standard lab instructor/TA	2 instructors per class of 16 or 19 students	Standard lab instructor/TA	1 for each workstation (5 total)	At least 2 instructors, to monitor students when modeling and prototyping	high school teachers, two university professors for introductory lectures. PhD students, post docs, or staff members for mentoring (12 researchers total). One post doc for fabrication. Research Associate to facilitate communication between schools	At least one teacher/technician	Lecturers with four teaching assistants (16 students broken into 4 each)
	Delivery	No mention	No mention	Part of a laboratory class, but details on delivery and the student-instructor interactions are limited.	Lab module split up into one session for building microfluidic and the second session for running reactions	Preliminary theoretical introduction to microfluidics then one laboratory exercise using microfluidics	Activity was introduced through guided worksheet and premade devices to introduce laminar flow	Lab module for students to investigate and design microfluidic devices. Emphasis on diffusion based mixing, zeta potential, electro osmotic flow, and microchannel electrophoretic separation of DNA ladder fragments	Instructors demonstrated device operation, then were available while students constructed and tested the device	Laboratory module added on to chemistry lab. Students were encouraged to apply their chemistry knowledge to engineering concepts.	Lab-on-a-chip workshop as a part of the University of Hull (UK) Annual Science Festival	Integrated microfluidics into "Fundamentals of Smart Systems Integration" module of Master's program	Lectures and chip ideation at school with check-ins from post doc about ongoing fab process encouraging students to ask questions	Part of nationwide program in Netherlands to engage high schoolers with miltidisciplinary science and engineering	No mention
	Environment	No mention	Best suited to laboratory	Laboratory	Laboratory	University lab classroom	Classroom	University lab classroom	Classroom or classroom like presentation	University chemistry lab classroom	Large room, 5 tables that each have 1 workstation that accomodates 4-5 students at a time	Computer room for CAD modeling and prototyping space for students to use laser cutter	Classroom/University Research Lab	Classroom	Classroom and Lab
	Schedule	2+ sessions: 1. Make Jell-o mold then cure overnight 2. Use Jell-o structures	No mention	1 session	2 sessions	2 sessions	No mention	No mention	No mention	No mention	No mention	No mention	No mention	No mention	5-8 hours / day, mixture of lecture and group activities
	Length	2 one hour class periods	None explicitly provided, estimates: PDMS device creation / molding for each module (3hrs), Diffusion / Separation Experiments (2 hrs), Immunoassay (5 hours) + any classroom instructions	up to 3 hours, microfluidic takes 30 mins to construct (per attempt)	2 hrs each session (4 hrs total)	no mention	5 45-minute class periods for design. 2 additional half class periods (22.5 min) for observing and redesign	4 weeks, 4 hrs per week (16 hrs total)	85 mins	two 4 hr lab periods	1 hour workshop composed of 10-15 min activity stations	12 hours, composed of four 3 hour long lab practicals	3+ months (meeting with schools, introductory lessons, student introduction to mentor, design of microfluidics, fabrication and pre-testing of devices, testing of chip, report writing)	4 hr training session for instructor and as many weeks as the school wants for activity (~3 weeks)	5 day course
	Planned Changes	No mention	No mention	No mention	No mention	no mention	Redesigning of the student's designs	No mention	Adpated for younger learners (2nd grade), but recommend against adapting for this age group (few details given).	No mention	No mention	Allowing students to test and redesign devices	No mention	No mention	No mention
	Unplanned Changes	No mention	No mention	Students may need several attempts to build device due to breaking the coverglass, over-exposing, or leaks. However, each step is short, materials are inexpensive, enabling students to start over if needed.	No mention	no mention	No mention	No mention	Revised assembly instructions after testing with first cohort, and only data is provided from second cohort	No mention	Demonstrators found that rather than explain "why a technique works the way it does", they needed to avoid depth or theory and explain "how a technique works"	Students expressed that more time in the lab prototyping would have been ideal. Authors noted that a literature review could have helped prepare the students better for the challenges they would face.	No mention	The adhesion for the foils wasn't very strong, limiting the amont of pressure that was able to be applied	No mention
	Attendance	No mention	No mention	3 semesters of class	Undergraduate students (chemistry and nonchemistry majors)	~40 students over 2 years	52 students	Pairs of upper division undergraduate analytical chemistry students	35 7th and 8th graders (12-13 yr old) in 2 cohorts of 16 and 19 students	Upper division undergraduate students	51 students, age 13-14	17 Masters students	98 12- to 13-year-olds across two schools. Teams of 5 students	70 upper secondary school students	16 MD/PhD students
	Assessment (data - learning,enjoyment,nothing,other)	Vary by grade level. Consist of four questions on what microfludic chips are and the characteristics of microfluidic flow.	No mention	None listed, although activity is focused on students understanding and visualizing electrophoresis. No microfluidic specfic learning objectives are listed.	No mention	no mention	4 question worksheet for concept introduction, free response on scientific discovery at the end.	Written report addressing guiding questions	Assessment of construction success (80% construction with no error, 32% leak rate, 80% success rate). Assessment of percieved difficulty: neither very easy nor difficult, Assessment of student enjoyment (8.3 of 10).	Prelab exercise for familiarization of microfluidic concepts and flow chemistry	Student questionnaire where students rate how much they liked each station, and answer if they have a better understanding of lab on a chip	ten question three page survey asking preferred approach to learning, previous lab experience, evaluation of lab practical, and suggestions	Questions for reflection based off of project manufacturing updates, reports written by students, and open ended questions about experience in activity	16 exercise questions, 2 question test	4 questions asking students opinion on their satisfaction and whether the activities supported their learning. Active learning
Technology section	Activity Resources	No mention	Polyolefin shrink film on nonshrinkable backing, PDMS, tubing, catheters, punches, Luer stubs, four-way stopcocks, 3mL syringes, fluorescent beads, DI water, fluorescein or food coloring, primary rabbit IgG, Phosphate buffered saline, bovine serum albumin, anti-rabbit fluorescent antibodies,	Coverglass, adhesive, photopolymerizable monomer mixture, 5 minute epoxy, platinum wire, disposable pipet tips, phosphate buffer, dye solutions	Glass slides, In wire, plastic beakers, petri dishes, aluminum block, razor blade, tubing, tweezers, optical adhesive, PDMS, calcium chloride, phenolphthalein, deionized water, epozy, food dye	E. coli, plasmids, resorufin-BD-glucuronide, fluorescein-BD-digalactopranoside, BugBuster	Shrinky Dink film, silicone polymer, weak acids, bases, and colorimetric pH indicator, scissors, vegetable oil, forceps, glass plates, petri dish, biopsy punch/mechanical pencil, double-sided transparent tape, syringes	PDMS, thermoplastic sheets, syringes, 16 gauge blunt needles, silicone tubing, glass microscope slides, platinum wire, lab coats, safet glasses, and gloves	Sheets of PMMA, double-sided tape, laser cutter, 16G blunt needles, silicone tubing, syringes, food dye, mineral oil, Euglena in water suspension	Shrinky dink sheets, PDMS, biopsy punch, needles, tubing, iron solution, ammonio solution, sodium citrate solution, HAuCL4 solution. Aniline solution, sodium nirate solution, aromatic compound solution, magnets.	Filtered food dyes suspended in water, filter paper discs, milk chocolate bars, fruit juice, lemon juice, paramount crystals, silicone mold rubber, doodle sheets, wax crayons, Pasteur pipettes, kimwipe blue rolls, pre-made chocolate molds, pre-made gradient chips, pre-made tissue on a chip	Sheets of PMMA, double-sided tape, laser cutter, 16G blunt needles, silicone tubing, syringes, food dye, colored beads	PMMA, PDMS, leur-lock connectors, tubing	tubing, plug, nuts, ferrules, leur connectors, stainless steel rings, 5 microfluidic chips, microfludic chip holders, foil, centrifuge tubes, demineralized water, oil, 2-propanol, clean room tissue, sorting box, carying case, instruction manual	No mention
	Activity Equipment	No mention	Computer, drafting software, laser-jet printer, toaster oven or heat gun, curing oven, plasma cleaner or cornoa discharger, microdialysis infusion pumps, fluorescent microscope,	1mm diamond drill, transparency photomask, UV lamp, aspirator (to remove and dispose of chemicals), and high voltage power supply	Hot plate, optical microscope, UV light source, camera	Micropipets, centrifuge, incubator, inverted microscope, CCD camera, syringe pumps, epifluoresence microscope	Computer program (I.E. Powerpoint), laser printer, oven, hot plate, scale, vacuum pump,	Plasma cleaner, syringe pump, USB digital microscope, electrophoresis chamber, electrophoresis power supply, USB data acquisition module, computer with labview, optical coupled excitation and detection system, green light emitting diode, optical fiber, two plano-convex coupling lenses, laser printer, running buffer, sieving matrix	supplied kits (above), low power (10x) microscope if performing phototaxis experiment	Laser printer, Tesla Coil, syringe pump	John Adams Sketch-a-Graph pantograph, steel rod, aluminum cylinder, hot plate, syringe pump	Computer, AutoCAD, COMSOL, laser cutter, syringe pumps, microscope, camera	Computer with AutoCAD/Corel Draw, thermal bonder, laser cutter, syringe pumps	Computer with LockIn amplifier software, syringe pumps, USB microscope	Not discussed in detail, but will need all materials needed to create microfluidics (essentially a cleanroom), as well as microscopes for measurements
	Prepatory Equipment/ Resources	Refridgerator (overnight / weekend cure of Jello)	n/a	Prep photomask ahead of time	n/a	Clean room facility to fabricate microfluidic molds	n/a	Instructor prepared fiber-optic fluorescence detection system and data logging software for students	laser cut PMMA	n/a	Injection Moulder, CNC milling machine	n/a	Meeting with the schools to set up with mentors, training for the university mentors, manufacturing at university campus. Four preparatory handbooks were provided to the schools.	Renting kit from the larger organization	n/a
	Implementation Challenges	No mention	Very resource intensive, equipment wouldn't be available even at many high end prepartory schools	Some of the chemicals used are eye/skin irritants and/or an environmental hazard. High voltage power supply is used (500V-1000V). UV lamp can damage skin and eyes.	The chemicals and equipment used could pose a hazard, limiting the settings/portability of the activity. It is best suited to be done in a traditional laboratory setting.	The narrowed scope on droplet microfluidics only introduces students to one type of microfluidic, along with the very specialized equipment list the activity is best suited for high resource university settings	Resources and equipment is quite accessible, but there is limited depth in the student understanding of microfluidics as it's limited directly to laminar mixing.	The euipment list is best suited for a laboratory setting, leaving it less portable for a regular classroom or low resource setting.	Also tried activity with 28 2nd and 3rd graders (7-8 yr old), and advise against using activity with this age group.	The chemicals used could pose a hazard, limiting the settings/portability of the activity.	Breadth is impressive, but also requires breadth of resources, breadth also limited depth of understanding, primary focus is exposure to lab on a chip	Provides lots of depth for student understanding of concepts, but relies heavily on access to prototyping equipment. Requires a very heavy time commitment for instructors. Students noted " demonstrators were 'working long hours in the lab with students'"	The students weren't able to gain hands on experience with the manufacturing of the micofluidics they designed. Having the post doc make all of the devices requires expensive specialized equipment, typically only found at the university level. Man power to put the activity alone was very involved with 12 academic mentors.	Weren't able to directly look at biological samples in the classroom. Extensive training required for instructors as well as lengthy manual/online forum to address troubleshooting.	No mention
				** The ability for students to make mistakes is treated neutrally to slightly negative "….it can take a little proactice… fortunately the materials are inexpensive and none of the steps take too long". But this likely helped with learning. The review paper by Rackus notes this as a detriment
		Table note: We have excluded the EBP section for this table. While the underlying concept of process thinking is relevant, the GREET guidelins invoke medical decision making whereas in this type of article discussions of the scientific method as a process of thinking are more appropriate. Because of that discontinuinty, we determined it to be inappropriate to evaluate other articles on these stan…
