# Supplementary figures and images for: An economical in-class sticker microfluidic activity develops student expertise in microscale physics and device manufacturing
Source: Royal Society of Chemistry journal article supplement (doi:10.1039/d3lc00912b), 2024-01-01

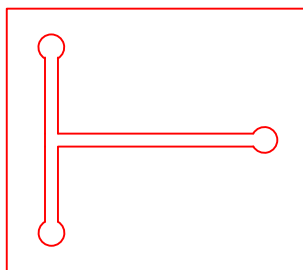

Supplement: d3lc00912b10.pdf [file d3lc00912b10.pdf]

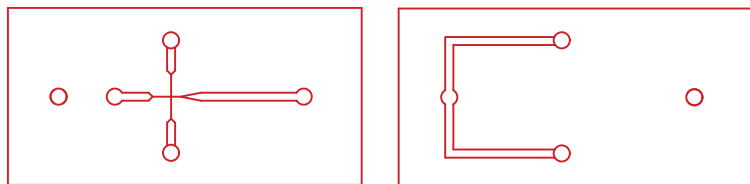

Supplement: d3lc00912b3.pdf [file d3lc00912b3.pdf]

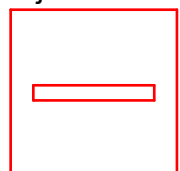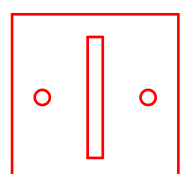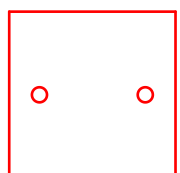

Supplement: d3lc00912b4.pdf [file d3lc00912b4.pdf]

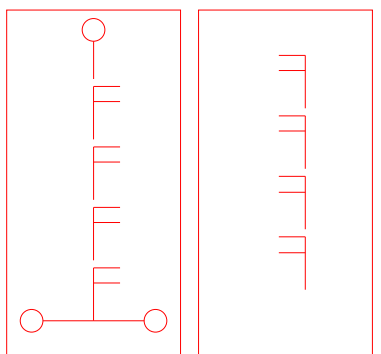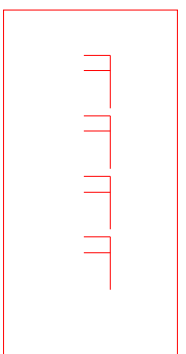

Supplement: d3lc00912b6.pdf [file d3lc00912b6.pdf]
